# Supplementary material
Source: PubMed Central journal article supplement (PMC3382346)
Supplement: supp_cws073_cws073supp.pdf [file supp_cws073_cws073supp.pdf]

## Supplementary Information

### A Siglec-like sialic acid binding motif found in an adenovirus capsid protein

Christoph Rademacher<sup>1</sup>, Thierry Bru<sup>2</sup>, Ryan McBride<sup>1</sup>, Elizabeth Robison<sup>1</sup>, Corwin M. Nycholat<sup>1</sup>, Eric J. Kremer<sup>2</sup>, James C. Paulson<sup>1\*</sup>

Supporting Tables S1 and S2

Supporting Figures S1 and S2

#### **Table S1: List of all complexes analyzed:**

1CT1; 1DBN; 1DFQ; 1DQF; 1E8U; 1F31; 1FV2; 1FV3; 1G1T; 1H7T; 1HGE; 1HGG; 1HGH; 1HGI; 1JSH; 1JSI; 1JSN; 1JSO; 1KQR; 1MQM; 1MQN; 1MWE; 1MX1; 1MX5; 1N1Y; 1NSC; 1QDD; 1QFO; 1QWJ; 1RVT; 1RVX; 1RVZ; 1S0I; 1S0J; 1SE3; 1URL; 1USR; 1USX; 1UXA; 1UXB; 1V0F; 1V3C; 1VPS; 1W0O; 1W0P; 1W1X; 1W20; 1W21; 1WGC; 1WW4; 1YA4; 1YA8; 1YAH; 1YAJ; 1YYN; 1Z4X; 2BAT; 2BER; 2BF6; 2C25; 2C4A; 2C4L; 2CHB; 2DF3; 2DQY; 2DQZ; 2DR0; 2DS0; 2EHI; 2H7C; 2HRL; 2HRQ; 2HRR; 2I2S; 2JH7; 2JHD; 2JHL; 2KMB; 2OSX; 2P3I; 2P3J; 2P3K; 2QWB; 2R61; 2RDG; 2RFT; 2RFU; 2V73; 2VU9; 2W68; 2W9L; 2WBV; 2WBW; 2WGC; 2WR1; 2WR2; 2WR3; 2WR4; 2WR7; 2WRB; 2WRE; 2WRF; 2WRG; 2WRH; 2Z8L; 2ZG1; 2ZG3; 2ZOE; 3B50; 3BWR; 3CHB; 3E81; 3F53; 3F5A; 3F5E; 3GVJ; 3GVK; 3GVL; 3H72; 3HMY; 3HN1; 3HTP; 3HTQ; 3HTT; 3JU4; 4HMG; 5HMG



**Table S2: Oligosaccharide probes included in the glycan microarray**

| Chart # | Structure                                                                           | IUPAC Nomenclature                                                                                                                                                                               |
|---------|-------------------------------------------------------------------------------------|--------------------------------------------------------------------------------------------------------------------------------------------------------------------------------------------------|
| 1       | 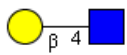   | Gal $\beta$ (1-4)-GlcNAc $\beta$ -ethyl-NH <sub>2</sub>                                                                                                                                          |
| 2       |    | Gal $\beta$ (1-4)-GlcNAc $\beta$ (1-2)-Man $\alpha$ (1-3)-[Gal $\beta$ (1-4)-GlcNAc $\beta$ (1-2)-Man $\alpha$ (1-6)]-Man $\beta$ (1-4)-GlcNAc $\beta$ (1-4)-GlcNAc $\beta$ -Asn-NH <sub>2</sub> |
| 3       |    | NeuAc $\alpha$ (2-3)-Gal $\beta$ (1-4)-6-sulfo-GlcNAc $\beta$ -propyl-NH <sub>2</sub>                                                                                                            |
| 4       |    | NeuAc $\alpha$ (2-3)-Gal $\beta$ (1-4)-[Fuc $\alpha$ (1-3)]-6-O-sulfo-GlcNAc $\beta$ -propyl-NH <sub>2</sub>                                                                                     |
| 5       |  | NeuAc $\alpha$ (2-3)-6-O-sulfo-Gal $\beta$ (1-4)-GlcNAc $\beta$ -ethyl-NH <sub>2</sub>                                                                                                           |
| 6       |  | NeuAc $\alpha$ (2-3)-6-O-sulfo-Gal $\beta$ (1-4)-[Fuc $\alpha$ (1-3)]-GlcNAc $\beta$ -propyl-NH <sub>2</sub>                                                                                     |
| 7       |  | NeuAc $\alpha$ (2-3)-Gal $\beta$ (1-3)-6-O-sulfo-GlcNAc $\beta$ -propyl-NH <sub>2</sub>                                                                                                          |
| 8       |  | NeuAc $\alpha$ (2-3)-Gal $\beta$ (1-4)-Glc $\beta$ -ethyl-NH <sub>2</sub>                                                                                                                        |

| Chart # | Structure                                                                           | IUPAC Nomenclature                                                                                                                                         |
|---------|-------------------------------------------------------------------------------------|------------------------------------------------------------------------------------------------------------------------------------------------------------|
| 9       |    | NeuAc $\alpha$ (2-3)-Gal $\beta$ (1-4)-GlcNAc $\beta$ -ethyl-NH <sub>2</sub>                                                                               |
| 10      |    | NeuAc $\alpha$ (2-3)-Gal $\beta$ (1-4)-GlcNAc $\beta$ (1-3)-Gal $\beta$ (1-4)-GlcNAc $\beta$ -ethyl-NH <sub>2</sub>                                        |
| 11      |    | NeuAc $\alpha$ (2-3)-Gal $\beta$ (1-4)-GlcNAc $\beta$ (1-3)-Gal $\beta$ (1-4)-GlcNAc $\beta$ (1-3)-Gal $\beta$ (1-4)-GlcNAc $\beta$ -ethyl-NH <sub>2</sub> |
| 12      |    | NeuAc $\alpha$ (2-3)-GalNAc $\beta$ (1-4)-GlcNAc $\beta$ -ethyl-NH <sub>2</sub>                                                                            |
| 13      |    | NeuAc $\alpha$ (2-3)-Gal $\beta$ (1-3)-GlcNAc $\beta$ -ethyl-NH <sub>2</sub>                                                                               |
| 14      |    | NeuAc $\alpha$ (2-3)-Gal $\beta$ (1-3)-GlcNAc $\beta$ (1-3)-Gal $\beta$ (1-4)-GlcNAc $\beta$ -ethyl-NH <sub>2</sub>                                        |
| 15      |  | NeuAc $\alpha$ (2-3)-Gal $\beta$ (1-3)-GlcNAc $\beta$ (1-3)-Gal $\beta$ (1-3)-GlcNAc $\beta$ -ethyl-NH <sub>2</sub>                                        |
| 16      |  | NeuAc $\alpha$ (2-3)-Gal $\beta$ (1-3)-GalNAc $\beta$ (1-3)-Gal $\alpha$ (1-4)-Gal $\beta$ (1-4)-Glc $\beta$ -ethyl-NH <sub>2</sub>                        |
| 17      |  | NeuAc $\alpha$ (2-3)-Gal $\beta$ (1-3)-GalNAc $\alpha$ -Thr-NH <sub>2</sub>                                                                                |
| 18      |  | NeuAc $\alpha$ (2-3)-Gal $\beta$ (1-3)-[GlcNAc $\beta$ (1-6)]-GalNAc $\alpha$ -Thr-NH <sub>2</sub>                                                         |
| 19      |  | NeuAc $\alpha$ (2-3)-Gal $\beta$ (1-4)-GlcNAc $\beta$ (1-6)-[Gal $\beta$ (1-3)]-GalNAc $\alpha$ -Thr-NH <sub>2</sub>                                       |

| Chart # | Structure                                                                           | IUPAC Nomenclature                                                                                                                                                                                                                                                                                                                                                                                     |
|---------|-------------------------------------------------------------------------------------|--------------------------------------------------------------------------------------------------------------------------------------------------------------------------------------------------------------------------------------------------------------------------------------------------------------------------------------------------------------------------------------------------------|
| 20      | 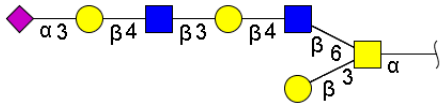   | NeuAc $\alpha$ (2-3)-Gal $\beta$ (1-4)-GlcNAc $\beta$ (1-3)-Gal $\beta$ (1-4)-GlcNAc $\beta$ (1-6)-[Gal $\beta$ (1-3)]-GalNAc $\alpha$ -Thr-NH <sub>2</sub>                                                                                                                                                                                                                                            |
| 21      |    | NeuAc $\alpha$ (2-3)-Gal $\beta$ (1-4)-GlcNAc $\beta$ (1-3)-GalNAc $\alpha$ -Thr-NH <sub>2</sub>                                                                                                                                                                                                                                                                                                       |
| 22      |    | NeuAc $\alpha$ (2-3)-Gal $\beta$ (1-4)-GlcNAc $\beta$ (1-3)-Gal $\beta$ (1-4)-GlcNAc $\beta$ (1-3)-GalNAc $\alpha$ -Thr-NH <sub>2</sub>                                                                                                                                                                                                                                                                |
| 23      |    | NeuAc $\alpha$ (2-3)-Gal $\beta$ (1-4)-GlcNAc $\beta$ (1-3)-[NeuAc $\alpha$ (2-3)-Gal $\beta$ (1-4)-GlcNAc $\beta$ (1-6)]-GalNAc $\alpha$ -Thr-NH <sub>2</sub>                                                                                                                                                                                                                                         |
| 24      |    | NeuAc $\alpha$ (2-3)-Gal $\beta$ (1-4)-GlcNAc $\beta$ (1-3)-Gal $\beta$ (1-4)-GlcNAc $\beta$ (1-3)-[NeuAc $\alpha$ (2-3)-Gal $\beta$ (1-4)-GlcNAc $\beta$ (1-3)-Gal $\beta$ (1-4)-GlcNAc $\beta$ (1-6)]-GalNAc $\alpha$ -Thr-NH <sub>2</sub>                                                                                                                                                           |
| 25      |   | NeuAc $\alpha$ (2-3)-Gal $\beta$ (1-4)-GlcNAc $\beta$ (1-2)-Man $\alpha$ (1-3)-[NeuAc $\alpha$ (2-3)-Gal $\beta$ (1-4)-GlcNAc $\beta$ (1-2)-Man $\alpha$ (1-6)]-Man $\beta$ (1-4)-GlcNAc $\beta$ (1-4)-GlcNAc $\beta$ -Asn-NH <sub>2</sub>                                                                                                                                                             |
| 26      |  | NeuAc $\alpha$ (2-3)-Gal $\beta$ (1-4)-GlcNAc $\beta$ (1-3)-Gal $\beta$ (1-4)-GlcNAc $\beta$ (1-2)-Man $\alpha$ (1-3)-[NeuAc $\alpha$ (2-3)-Gal $\beta$ (1-4)-GlcNAc $\beta$ (1-3)-Gal $\beta$ (1-4)-GlcNAc $\beta$ (1-2)-Man $\alpha$ (1-6)]-Man $\beta$ (1-4)-GlcNAc $\beta$ (1-4)-GlcNAc $\beta$ -Asn-NH <sub>2</sub>                                                                               |
| 27      |  | NeuAc $\alpha$ (2-3)-Gal $\beta$ (1-4)-GlcNAc $\beta$ (1-3)-Gal $\beta$ (1-4)-GlcNAc $\beta$ (1-3)-Gal $\beta$ (1-4)-GlcNAc $\beta$ (1-2)-Man $\alpha$ (1-3)-[NeuAc $\alpha$ (2-3)-Gal $\beta$ (1-4)-GlcNAc $\beta$ (1-3)-Gal $\beta$ (1-4)-GlcNAc $\beta$ (1-3)-Gal $\beta$ (1-4)-GlcNAc $\beta$ (1-2)-Man $\alpha$ (1-6)]-Man $\beta$ (1-4)-GlcNAc $\beta$ (1-4)-GlcNAc $\beta$ -Asn-NH <sub>2</sub> |
| 28      |  | NeuAc $\alpha$ (2-3)-[GalNAc $\beta$ (1-4)]-Gal $\beta$ (1-4)-GlcNAc $\beta$ -ethyl-NH <sub>2</sub>                                                                                                                                                                                                                                                                                                    |
| 29      |  | NeuAc $\alpha$ (2-3)-[GalNAc $\beta$ (1-4)]-Gal $\beta$ (1-4)-Glc $\beta$ -ethyl-NH <sub>2</sub>                                                                                                                                                                                                                                                                                                       |

| Chart # | Structure | IUPAC Nomenclature                                                                                                                                                                                                        |
|---------|-----------|---------------------------------------------------------------------------------------------------------------------------------------------------------------------------------------------------------------------------|
| 30      |           | Gal $\beta$ (1-3)-GalNAc $\beta$ (1-4)-[NeuAc $\alpha$ (2-3)]-Gal $\beta$ (1-4)-Glc $\beta$ -ethyl-NH <sub>2</sub>                                                                                                        |
| 31      |           | NeuAc $\alpha$ (2-3)-Gal $\beta$ (1-4)-[Fuc $\alpha$ (1-3)]-GlcNAc $\beta$ -propyl-NH <sub>2</sub>                                                                                                                        |
| 32      |           | NeuAc $\alpha$ (2-3)-Gal $\beta$ (1-3)-[Fuc $\alpha$ (1-4)]-GlcNAc $\beta$ (1-3)-Gal $\beta$ (1-4)-[Fuc $\alpha$ (1-3)]-GlcNAc $\beta$ -ethyl-NH <sub>2</sub>                                                             |
| 33      |           | NeuAc $\alpha$ (2-3)-Gal $\beta$ (1-4)-[Fuc $\alpha$ (1-3)]-GlcNAc $\beta$ (1-3)-Gal $\beta$ (1-4)-[Fuc $\alpha$ (1-3)]-GlcNAc $\beta$ -ethyl-NH <sub>2</sub>                                                             |
| 34      |           | NeuAc $\alpha$ (2-3)-Gal $\beta$ (1-4)-[Fuc $\alpha$ (1-3)]-GlcNAc $\beta$ (1-3)-Gal $\beta$ (1-4)-[Fuc $\alpha$ (1-3)]-GlcNAc $\beta$ (1-3)-Gal $\beta$ (1-4)-[Fuc $\alpha$ (1-3)]-GlcNAc $\beta$ -ethyl-NH <sub>2</sub> |
| 35      |           | NeuGc $\alpha$ (2-3)-Gal $\beta$ (1-4)-GlcNAc $\beta$ -ethyl-NH <sub>2</sub>                                                                                                                                              |
| 36      |           | NeuAc $\alpha$ (2-6)-Gal $\beta$ (1-4)-6-sulfo-GlcNAc $\beta$ -propyl-NH <sub>2</sub>                                                                                                                                     |
| 37      |           | NeuAc $\alpha$ (2-6)-Gal $\beta$ (1-4)-Glc $\beta$ -ethyl-NH <sub>2</sub>                                                                                                                                                 |

| Chart # | Structure                                                                           | IUPAC Nomenclature                                                                                                                                          |
|---------|-------------------------------------------------------------------------------------|-------------------------------------------------------------------------------------------------------------------------------------------------------------|
| 38      |    | NeuAc $\alpha$ (2-6)-Gal $\beta$ (1-4)-GlcNAc $\beta$ -ethyl-NH <sub>2</sub>                                                                                |
| 39      |    | NeuAc $\alpha$ (2-6)-Gal $\beta$ (1-4)-GlcNAc $\beta$ (1-3)-Gal $\beta$ (1-4)-GlcNAc $\beta$ -ethyl-NH <sub>2</sub>                                         |
| 40      |    | NeuAc $\alpha$ (2-6)-Gal $\beta$ (1-4)-GlcNAc $\beta$ (1-3)-Gal $\beta$ (1-4)-GlcNAc $\beta$ (1-3)-Gal $\beta$ (1-4)-GlcNAc $\beta$ -ethyl-NH <sub>2</sub>  |
| 41      |    | NeuAc $\alpha$ (2-6)-Gal $\beta$ (1-4)-GlcNAc $\beta$ (1-3)-[NeuAc $\alpha$ (2-6)]-Gal $\beta$ (1-4)-GlcNAc $\beta$ -ethyl-NH <sub>2</sub>                  |
| 42      |    | NeuAc $\alpha$ (2-6)-GalNAc $\beta$ (1-4)-GlcNAc $\beta$ -ethyl-NH <sub>2</sub>                                                                             |
| 43      |  | NeuAc $\alpha$ (2-6)-[Gal $\beta$ (1-3)]-GalNAc $\alpha$ -Thr-NH <sub>2</sub>                                                                               |
| 44      |  | NeuAc $\alpha$ (2-6)-Gal $\beta$ (1-4)-GlcNAc $\beta$ (1-6)-[Gal $\beta$ (1-3)]-GalNAc $\alpha$ -Thr-NH <sub>2</sub>                                        |
| 45      |  | NeuAc $\alpha$ (2-6)-Gal $\beta$ (1-4)-GlcNAc $\beta$ (1-3)-Gal $\beta$ (1-4)-GlcNAc $\beta$ (1-6)-[Gal $\beta$ (1-3)]-GalNAc $\alpha$ -Thr-NH <sub>2</sub> |
| 46      |  | NeuAc $\alpha$ (2-6)-Gal $\beta$ (1-4)-GlcNAc $\beta$ (1-3)-GalNAc $\alpha$ -Thr-NH <sub>2</sub>                                                            |
| 47      |  | NeuAc $\alpha$ (2-6)-Gal $\beta$ (1-4)-GlcNAc $\beta$ (1-3)-Gal $\beta$ (1-4)-GlcNAc $\beta$ (1-3)-GalNAc $\alpha$ -Thr-NH <sub>2</sub>                     |

| Chart # | Structure                                                                           | IUPAC Nomenclature                                                                                                                                                                                                                                                                                                                                                                                     |
|---------|-------------------------------------------------------------------------------------|--------------------------------------------------------------------------------------------------------------------------------------------------------------------------------------------------------------------------------------------------------------------------------------------------------------------------------------------------------------------------------------------------------|
| 48      | 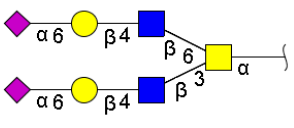   | NeuAc $\alpha$ (2-6)-Gal $\beta$ (1-4)-GlcNAc $\beta$ (1-3)-[NeuAc $\alpha$ (2-6)-Gal $\beta$ (1-4)-GlcNAc $\beta$ (1-6)]-GalNAc $\alpha$ -Thr-NH <sub>2</sub>                                                                                                                                                                                                                                         |
| 49      |    | NeuAc $\alpha$ (2-6)-Gal $\beta$ (1-4)-GlcNAc $\beta$ (1-3)-Gal $\beta$ (1-4)-GlcNAc $\beta$ (1-3)-[NeuAc $\alpha$ (2-6)-Gal $\beta$ (1-4)-GlcNAc $\beta$ (1-3)-Gal $\beta$ (1-4)-GlcNAc $\beta$ (1-6)]-GalNAc $\alpha$ -Thr-NH <sub>2</sub>                                                                                                                                                           |
| 50      |    | Gal $\beta$ (1-4)-GlcNAc $\beta$ (1-2)-Man $\alpha$ (1-3)-[NeuAc $\alpha$ (2-6)-Gal $\beta$ (1-4)-GlcNAc $\beta$ (1-2)-Man $\alpha$ (1-6)]-Man $\beta$ (1-4)-GlcNAc $\beta$ (1-4)-GlcNAc $\beta$ -Asn-NH <sub>2</sub>                                                                                                                                                                                  |
| 51      |    | NeuAc $\alpha$ (2-6)-Gal $\beta$ (1-4)-GlcNAc $\beta$ (1-2)-Man $\alpha$ (1-3)-[Gal $\beta$ (1-4)-GlcNAc $\beta$ (1-2)-Man $\alpha$ (1-6)]-Man $\beta$ (1-4)-GlcNAc $\beta$ (1-4)-GlcNAc $\beta$ -Asn-NH <sub>2</sub>                                                                                                                                                                                  |
| 52      |   | GlcNAc $\beta$ (1-2)-Man $\alpha$ (1-3)-[NeuAc $\alpha$ (2-6)-Gal $\beta$ (1-4)-GlcNAc $\beta$ (1-2)-Man $\alpha$ (1-6)]-Man $\beta$ (1-4)-GlcNAc $\beta$ (1-4)-GlcNAc $\beta$ -Asn-NH <sub>2</sub>                                                                                                                                                                                                    |
| 53      |  | NeuAc $\alpha$ (2-6)-Gal $\beta$ (1-4)-GlcNAc $\beta$ (1-2)-Man $\alpha$ (1-3)-[NeuAc $\alpha$ (2-6)-Gal $\beta$ (1-4)-GlcNAc $\beta$ (1-2)-Man $\alpha$ (1-6)]-Man $\beta$ (1-4)-GlcNAc $\beta$ (1-4)-GlcNAc $\beta$ -Asn-NH <sub>2</sub>                                                                                                                                                             |
| 54      |  | NeuAc $\alpha$ (2-6)-Gal $\beta$ (1-4)-GlcNAc $\beta$ (1-3)-Gal $\beta$ (1-4)-GlcNAc $\beta$ (1-2)-Man $\alpha$ (1-3)-[NeuAc $\alpha$ (2-6)-Gal $\beta$ (1-4)-GlcNAc $\beta$ (1-3)-Gal $\beta$ (1-4)-GlcNAc $\beta$ (1-2)-Man $\alpha$ (1-6)]-Man $\beta$ (1-4)-GlcNAc $\beta$ (1-4)-GlcNAc $\beta$ -Asn-NH <sub>2</sub>                                                                               |
| 55      |  | NeuAc $\alpha$ (2-6)-Gal $\beta$ (1-4)-GlcNAc $\beta$ (1-3)-Gal $\beta$ (1-4)-GlcNAc $\beta$ (1-3)-Gal $\beta$ (1-4)-GlcNAc $\beta$ (1-2)-Man $\alpha$ (1-3)-[NeuAc $\alpha$ (2-6)-Gal $\beta$ (1-4)-GlcNAc $\beta$ (1-3)-Gal $\beta$ (1-4)-GlcNAc $\beta$ (1-3)-Gal $\beta$ (1-4)-GlcNAc $\beta$ (1-2)-Man $\alpha$ (1-6)]-Man $\beta$ (1-4)-GlcNAc $\beta$ (1-4)-GlcNAc $\beta$ -Asn-NH <sub>2</sub> |
| 56      |  | NeuGc $\alpha$ (2-6)-Gal $\beta$ (1-4)-GlcNAc $\beta$ -ethyl-NH <sub>2</sub>                                                                                                                                                                                                                                                                                                                           |
| 57      |  | NeuAc $\alpha$ (2-3)-Gal $\beta$ (1-4)-GlcNAc $\beta$ (1-2)-Man $\alpha$ (1-3)-[NeuAc $\alpha$ (2-6)-Gal $\beta$ (1-4)-GlcNAc $\beta$ (1-2)-Man $\alpha$ (1-6)]-Man $\beta$ (1-4)-GlcNAc $\beta$ (1-4)-GlcNAc $\beta$ -Asn-NH <sub>2</sub>                                                                                                                                                             |



| Chart # | Structure | IUPAC Nomenclature                                                                                                                                                                                                                                                                                                                                  |
|---------|-----------|-----------------------------------------------------------------------------------------------------------------------------------------------------------------------------------------------------------------------------------------------------------------------------------------------------------------------------------------------------|
| 58      |           | <p>NeuAc<math>\alpha</math>(2-6)-Gal<math>\beta</math>(1-4)-GlcNAc<math>\beta</math>(1-2)-Man<math>\alpha</math>(1-3)-[NeuAc<math>\alpha</math>(2-3)-Gal<math>\beta</math>(1-4)-GlcNAc<math>\beta</math>(1-2)-Man<math>\alpha</math>(1-6)]-Man<math>\beta</math>(1-4)-GlcNAc<math>\beta</math>(1-4)-GlcNAc<math>\beta</math>-Asn-NH<sub>2</sub></p> |

Supporting Figure S1:

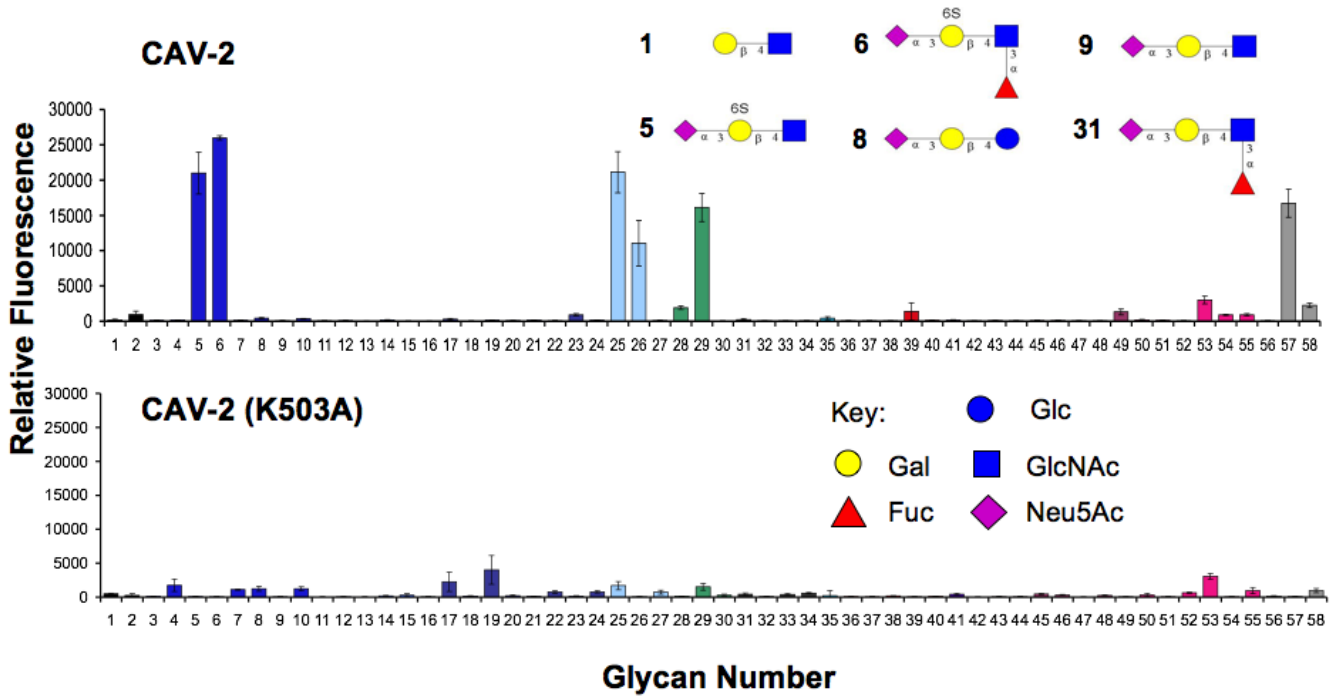

**Glycan array analysis of the WT and K503A CAV-2 fiber knob protein at 500 ug/ml final concentration.** (Top) In addition to sialosides **5** and **6** found at lower protein concentrations (50 ug/ml), structures bearing terminal  $\alpha$ 2,3)-linked Neu5Ac **25**, **26**, **29** and **57** are detected by the fiber knob protein. (Bottom) The mutant CAV-2 (K503A) does not bind significantly to the printed sialoside array at high concentrations.

**Supporting Figure S2:**

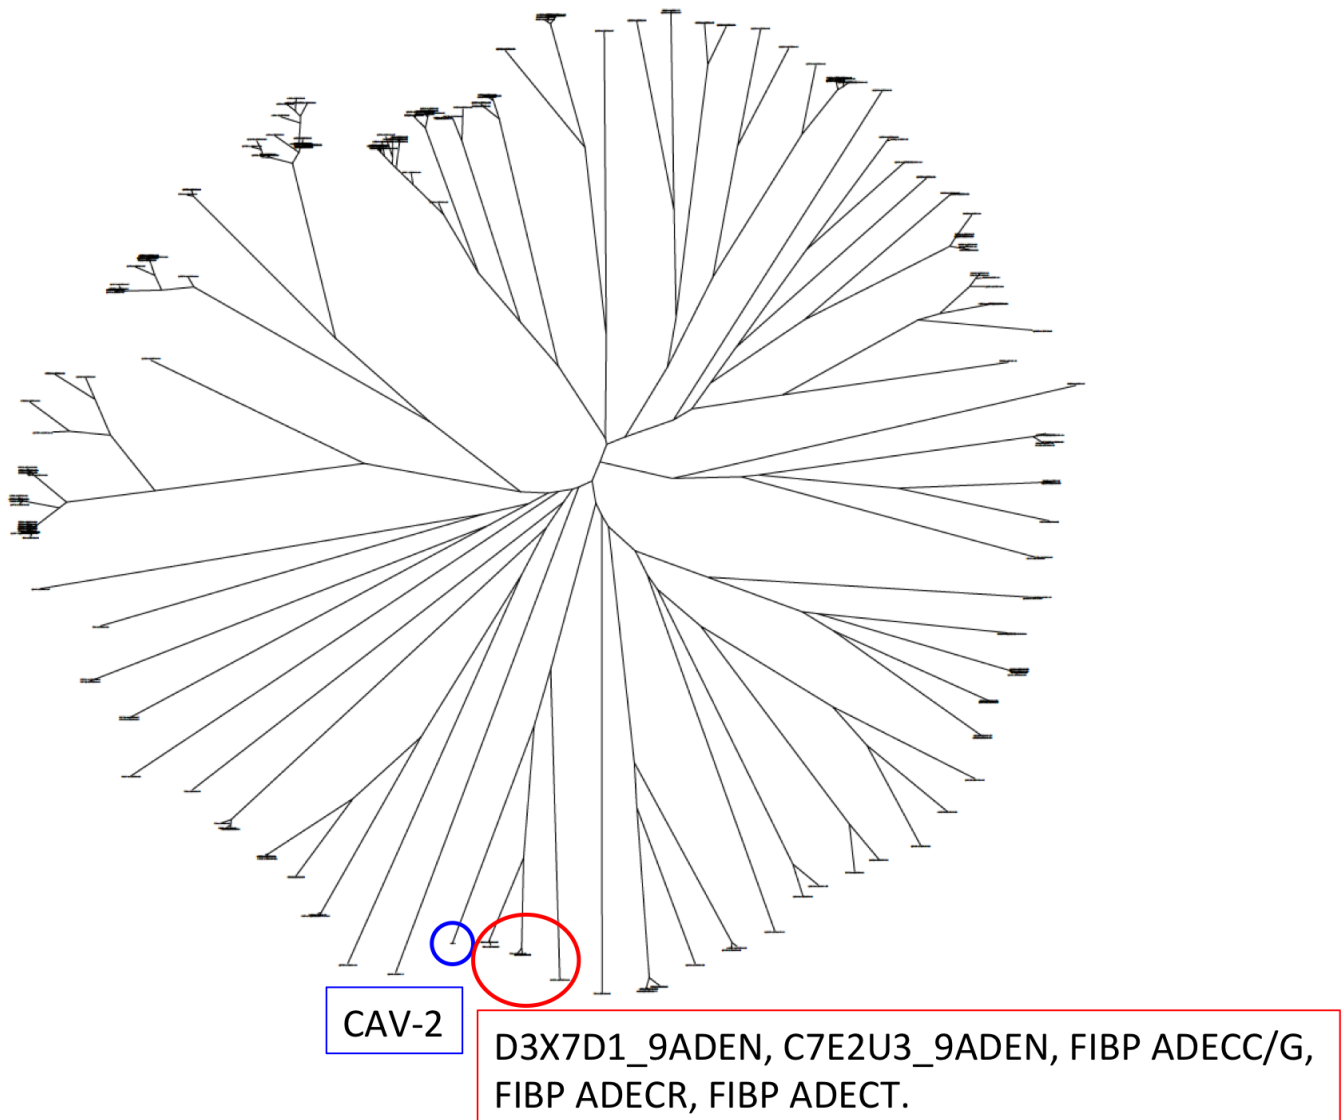

**Sequence alignment and family tree of adeno fiber knobs:**

A multiple sequence alignment of the adenoviral fibre protein family (PF00541) provided by the PFAM database was extended by the CAV-2 sequence (Uniprot: Q65914) in ClustalX (version 2.0.9). The following sequences contain the essential arginine stretch FRFLN: D3X7D1\_9ADEN, C7E2U3\_9ADEN, FIBP ADECC, FIBP ADECG, FIBP ADECR, FIBP ADECT. The knobs also contain a lysine residue in a similar position. A family dendrogram resulting from the alignment file was visualized using drawtree as implemented on the mobyle server (Felsenstein, J. 1993. PHYLIP (Phylogeny Inference Package) version 3.5c. Distributed by the author. Department of Genetics, University of Washington, Seattle.).
